# Supplementary material for: Differential Effects of Drug Interventions and Dietary Lifestyle in Developing Type 2 Diabetes and Complications: A Systems Biology Analysis in LDLr−/− Mice
Source: PubMed Central journal article supplement (PMC3574110; doi:10.1371/journal.pone.0056122), 2013-02-15
Supplement: pone.0056122.s002.pdf [file pone.0056122.s002.pdf]

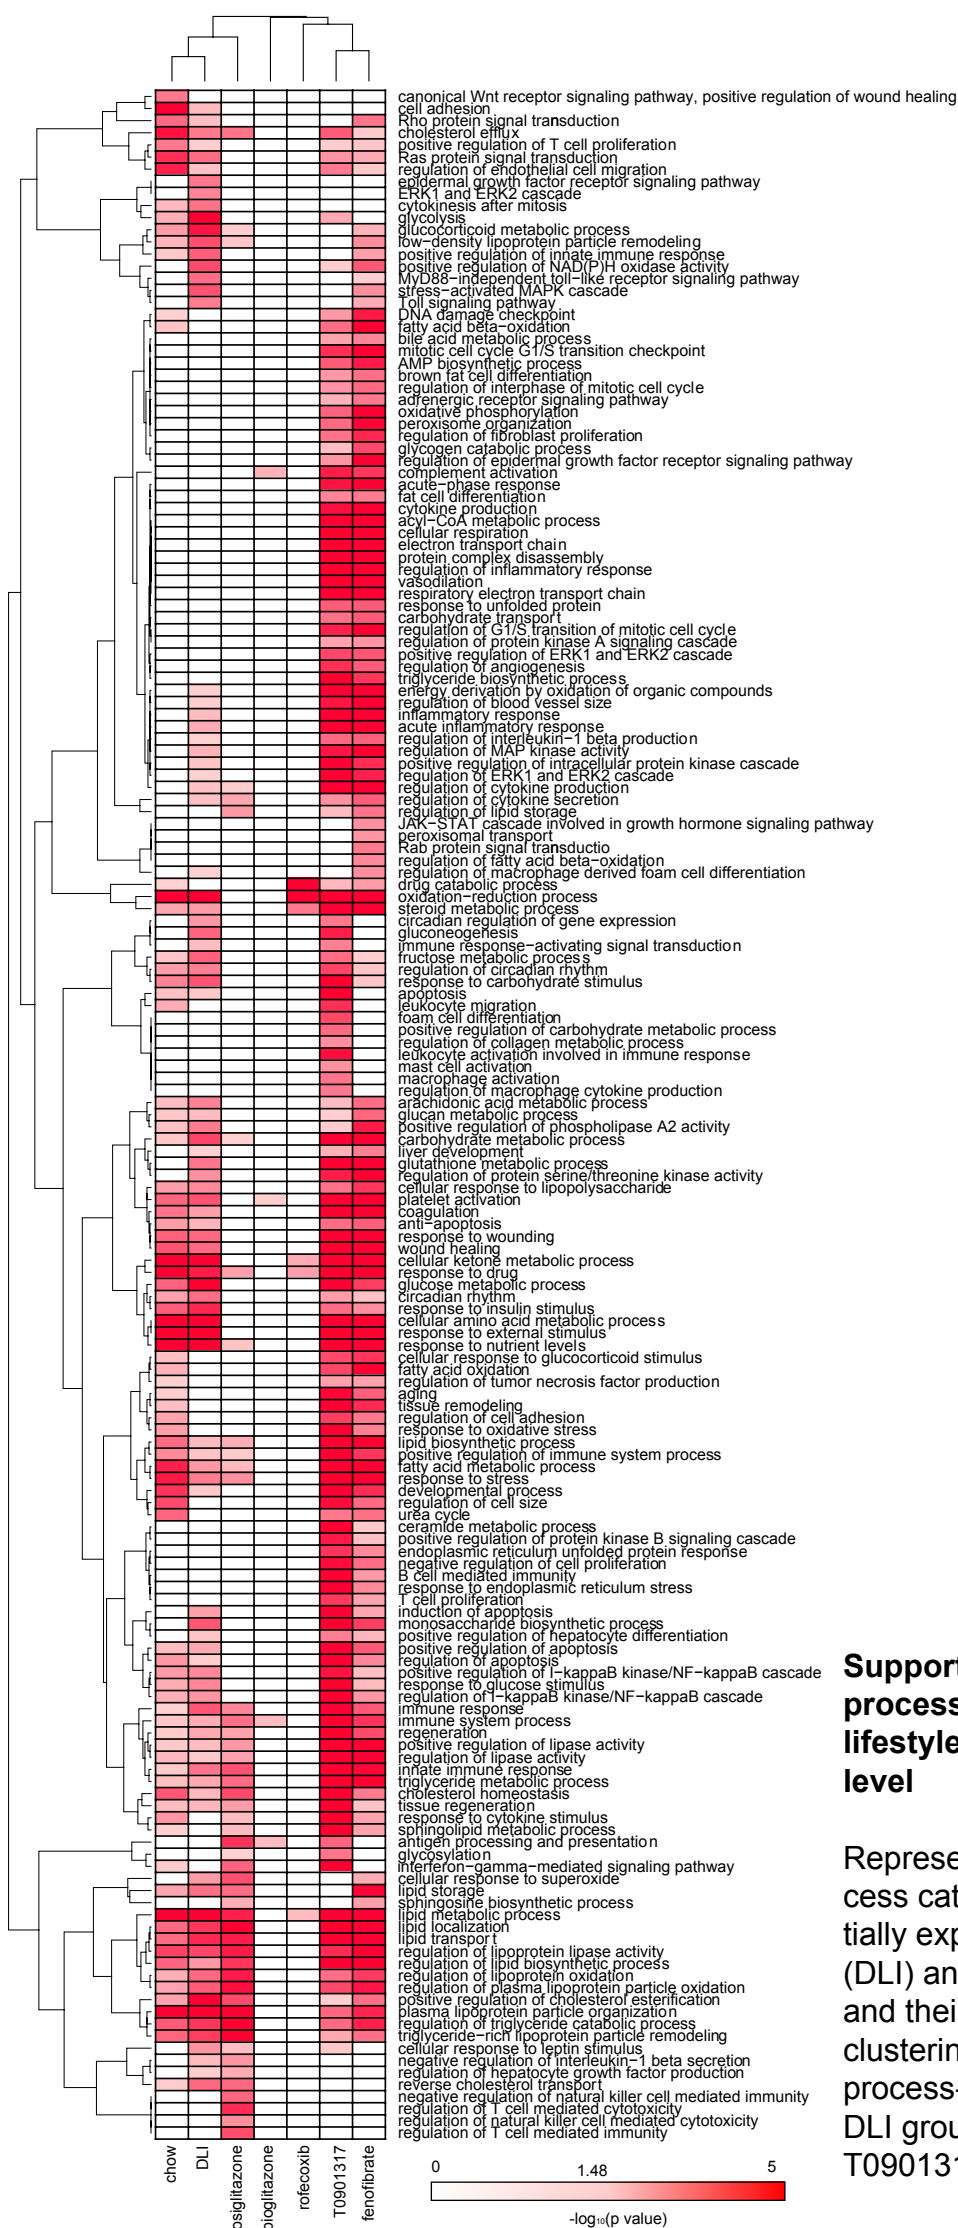

**Supporting Information Fig 2. Biological processes affected by drug and dietary lifestyle interventions on a transcriptome level**

Representative Gene Ontology Biological Process categories overrepresented among differentially expressed transcripts in dietary lifestyle (DLI) and drug intervention groups (vs. HFD), and their corresponding p-values (heatmap). The clustering tree highlights a similarity between process-enrichment profiles of chow control and DLI groups and between fenofibrate and T0901317 groups.
